# Supplementary material for: A Pyranoxanthone as a Potent Antimitotic and Sensitizer of Cancer Cells to Low Doses of Paclitaxel
Source: MDPI journal article supplement (doi:10.3390/molecules25245845), 2020-12-10
Supplement: s1 [file s1]

SUPPLEMENTARY MATERIALS

Article

# A Pyranoxanthone as a Potent Antimitotic and Sensitizer of Cancer Cells to Low Doses of Paclitaxel

Fábio França <sup>1,2,†</sup>, Patrícia M. A. Silva <sup>1,†</sup>, José X. Soares <sup>3,†</sup>, Ana C. Henriques <sup>1,4</sup>, Daniela R. P. Loureiro <sup>4,5</sup>, Carlos M. G. Azevedo <sup>5</sup>, Carlos M. M. Afonso <sup>4,5,\*</sup> and Hassan Bousbaa <sup>1,4,\*</sup>

<sup>1</sup> CESPU, Institute of Research and Advanced Training in Health Sciences and Technologies (IINFACTS), University Institute of Health Sciences (IUCS), Rua Central de Gandra, 1317, 4585-322 Gandra PRD, Portugal; fabiofuff@gmail.com (F.F.); patricia.silva@cespu.pt (P.M.A.S.); A24955@alunos.cespu.pt (A.C.H.)

<sup>2</sup> Department of Biomedical Sciences and Medicine, University of Algarve, 8005-139 Faro, Portugal

<sup>3</sup> LAQV-REQUIMTE, Department of Chemical Sciences, Laboratory of Applied Chemistry, Faculty of Pharmacy, University of Porto. Rua de Jorge Viterbo Ferreira, 228, 4050-313 Porto, Portugal; jfxsoares@ff.up.pt

<sup>4</sup> Interdisciplinary Center of Marine and Environmental Investigation (CIIMAR/CIMAR), Edifício do Terminal de Cruzeiros do Porto de Leixões, Av. General Norton de Matos s/n, 4050-208 Matosinhos, Porto, Portugal; dloureiro@ff.up.pt (D.R.P.L.)

<sup>5</sup> Department of Chemical Sciences, Laboratory of Organic and Pharmaceutical Chemistry, Faculty of Pharmacy, University of Porto; 4050-313 Porto, Portugal; cgoncalves.azevedo@gmail.com

\* Correspondence: hassan.bousbaa@iucs.cespu.pt (H.B.); cafonso@ff.up.pt (C.M.M.A); Tel.: +351-224-157-186 (H.B.); +351-220-428-692 (C.M.M.A)

† These authors contributed equally to this work.

## Table of content

|                                                                                                                                                                                          |   |
|------------------------------------------------------------------------------------------------------------------------------------------------------------------------------------------|---|
| Figure S1: <sup>1</sup> H NMR spectrum of compound 8.                                                                                                                                    | 2 |
| Figure S2: <sup>13</sup> C NMR spectrum of compound 8.                                                                                                                                   | 2 |
| Figure S3: <sup>1</sup> H NMR spectrum of compound 2.                                                                                                                                    | 3 |
| Figure S4: <sup>13</sup> C NMR spectrum of compound 2.                                                                                                                                   | 3 |
| Figure S5: Lung non-tumor HPAEpiC cells are less sensitive to the antimitotic activity of pyranoxanthone 2                                                                               | 4 |
| Figure S6: Treatment with pyranoxanthone 2 (PX2) induces chromosome misalignment phenotype and leads to apoptotic cell death in MCF-7 (a and c) and A375-C5 (b and d) cancer cell lines. | 5 |

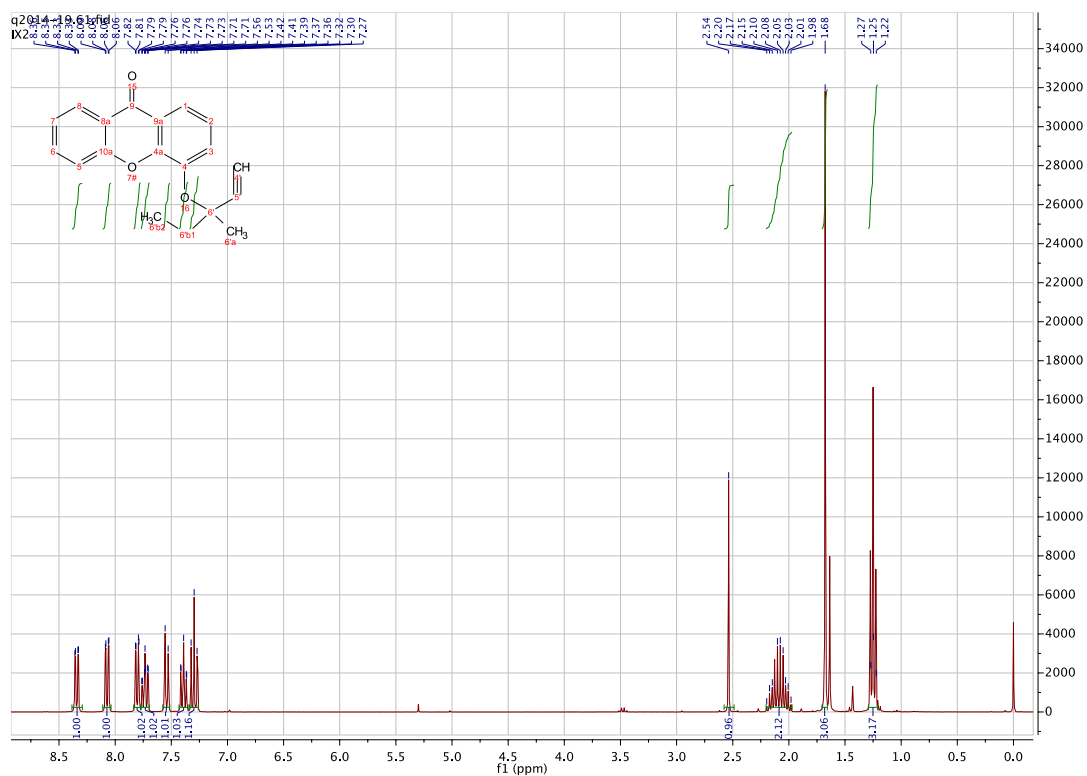

**Figure 1.**  $^1\text{H}$  NMR spectrum of compound 8.

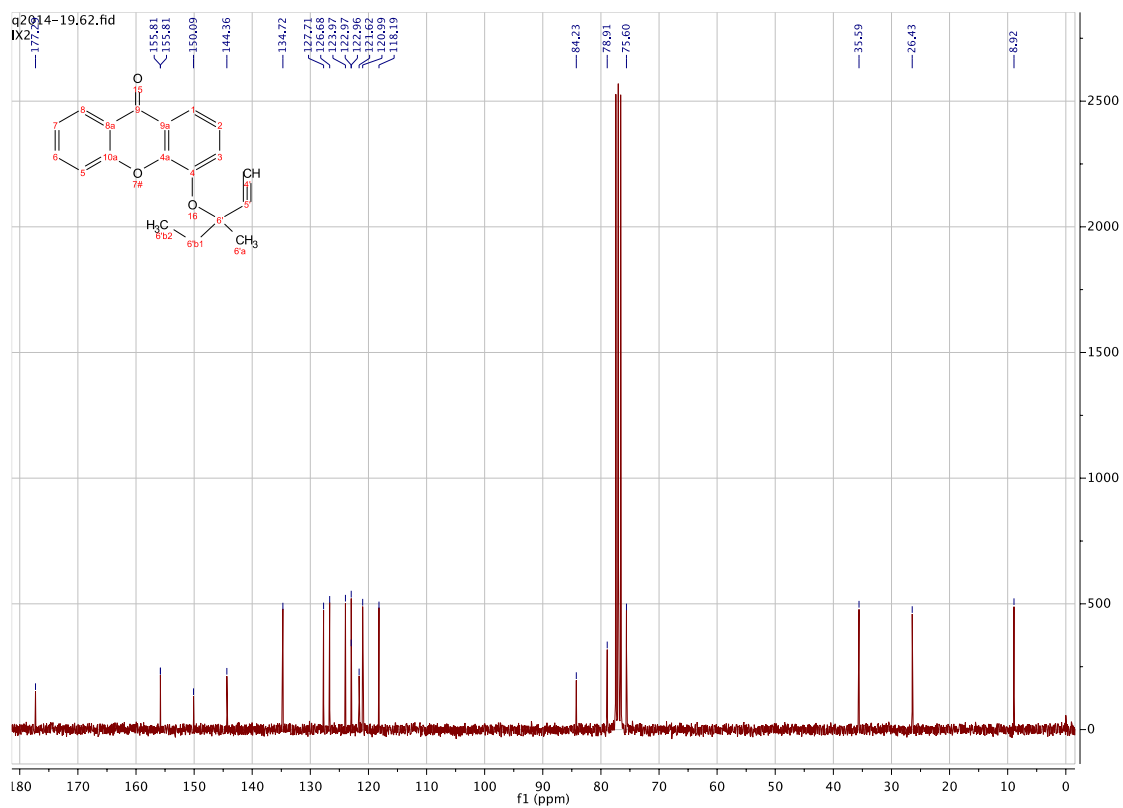

**Figure 2.**  $^{13}\text{C}$  NMR spectrum of compound 8.

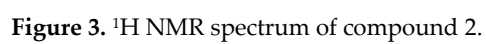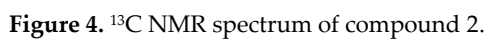

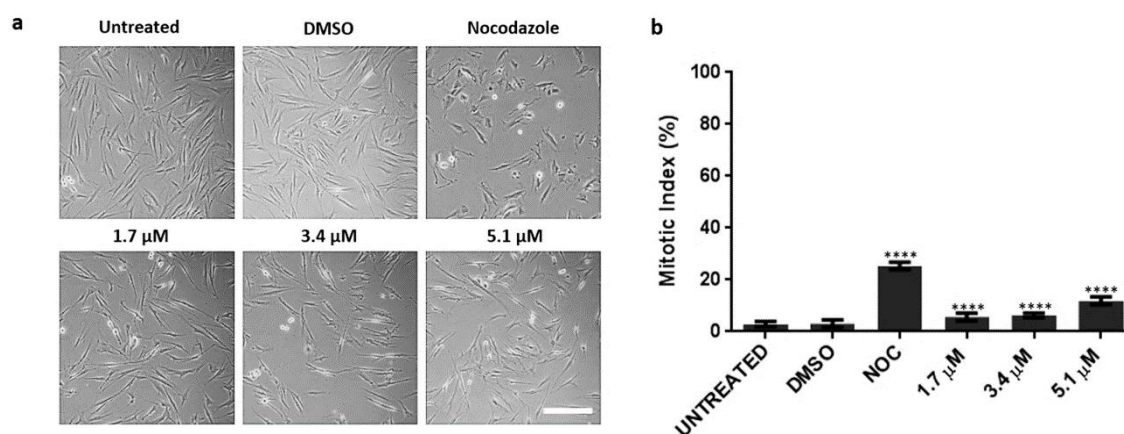

**Figure S5:** Lung non-tumor HPAEpiC cells are less sensitive to the antimitotic activity of pyranoxanthone 2 (PX2). (a) Representative phase contrast microscopy images, after 16 h treatment with pyranoxanthone 2 (PX2), at indicated concentrations. Nocodazole was used as a positive control. DMSO was used as a compound solvent control. Bar, 10  $\mu\text{m}$ . (b) Mitotic index graph with statistical relevance of \*  $p < 0.05$ , \*\*  $p < 0.01$  and \*\*\*  $p < 0.001$  by unpaired t-test.

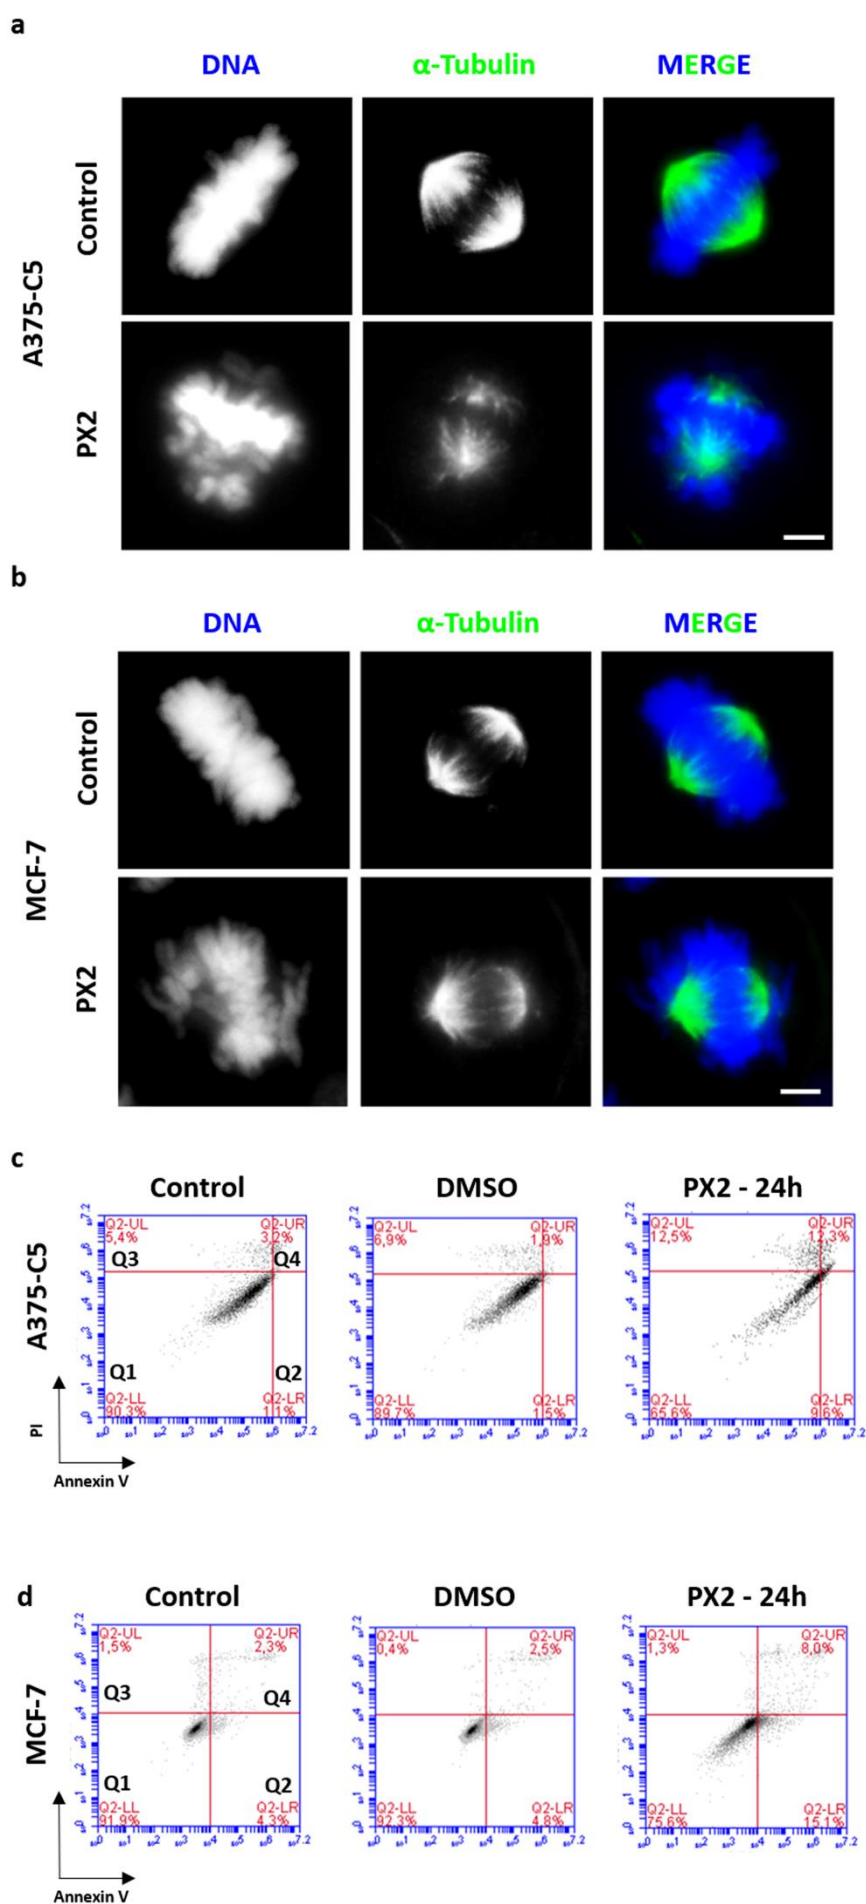

**Figure 6.** Treatment with pyranoxanthone 2 (PX2) induces chromosome misalignment phenotype and leads to apoptotic cell death in MCF-7 (**a** and **c**) and A375-C5 (**b** and **d**) cancer cell lines. (**a** and **b**) Immunofluorescence images of untreated cell (Top), in metaphase, with all chromosomes aligned at equatorial zone, and PX2-treated cell (Bottom), arrested in prometaphase-like state, showing several misaligned chromosomes. Microtubules (green) were stained with anti- $\alpha$ -tubulin antibody and DNA (blue) with DAPI. Bar, 5  $\mu$ m. (**c** and **d**) Flow cytometry analysis of apoptosis by Annexin V/PI co-staining, 24 hours after PX2 treatment. The quadrants Q were defined as Q1 = live (Annexin V- and PI-negative), Q2 = early stage of apoptosis (Annexin V-positive/PI-negative), Q3 = late stage of apoptosis (Annexin V- and PI-positive) and Q4 = necrosis (Annexin V-negative/PI-positive).

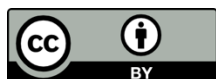

© 2020 by the authors. Submitted for possible open access publication under the terms and conditions of the Creative Commons Attribution (CC BY) license (<http://creativecommons.org/licenses/by/4.0/>).
